# Supplementary material for: Effect of Performance Feedback on Community Health Workers’ Motivation and Performance in Madhya Pradesh, India: A Randomized Controlled Trial
Source: PubMed Central journal article supplement (PMC5177738; doi:10.2196/publichealth.3381), 2016-12-07
Supplement: publichealth_v2i2e169_app2.pdf [file publichealth_v2i2e169_app2.pdf]

**Results of matching based on ranks and treatment groups**

O=original, R=replaced; Marital Status: M=married; S=single; W=widow

| Treatment              | Rank |    | Age |    | Edu |    | Start Year |     | Marital Status |   | Number of Children in Household |   | Number of Adults in Household |   | Participate in Other Work |   |
|------------------------|------|----|-----|----|-----|----|------------|-----|----------------|---|---------------------------------|---|-------------------------------|---|---------------------------|---|
|                        | O    | R  | O   | R  | O   | R  | O          | R   | O              | R | O                               | R | O                             | R | O                         | R |
| Form Submissions       | 19   | 16 | 32  | 24 | 8   | 12 | '11        | '10 | M              | M | 2                               | 2 | 6                             | 5 | 0                         | 1 |
| Form Submissions       | 46   | 43 | .   | 29 | .   | 8  | .          | .   | .              | M | .                               | 2 | .                             | 3 | .                         | 0 |
| Form Submissions       | 49   | 53 | 31  | 26 | 12  | 16 | '12        | .   | M              | M | 4                               | 0 | 2                             | 6 | 0                         | 0 |
| Form Submissions       | 59   | 56 | 21  | 30 | 10  | 12 | '10        | '10 | M              | W | 1                               | 3 | 4                             | 7 | 0                         | 0 |
| Case Activity          | 45   | 47 | 22  | 28 | 8   | 10 | '11        | '10 | M              | M | 2                               | 3 | 2                             | 6 | 0                         | 0 |
| Case Activity          | 56   | 55 | 36  | 40 | 10  | 8  | '10        | '11 | M              | M | 2                               | 5 | 3                             | 2 | 0                         | 0 |
| Duration of Counseling | 42   | 44 | 23  | 28 | 12  | 16 | .          | '11 | M              | S | 1                               | 0 | 3                             | 5 | 0                         | 0 |
| Duration of Counseling | 47   | 44 | 22  | 28 | 12  | 16 | '12        | '11 | M              | S | 1                               | 0 | 4                             | 5 | 0                         | 0 |
| Duration of Counseling | 51   | 53 | 31  | 28 | 12  | 12 | '10        | '10 | M              | S | 3                               | 0 | 4                             | 5 | 0                         | 1 |
| Duration of Counseling | 60   | 56 | 18  | 32 | 11  | 12 | '12        | '10 | S              | M | 0                               | 2 | 7                             | 4 | 0                         | 0 |
